# Supplementary material for: High strength films with gas-barrier fabricated from chitin solution dissolved at low temperature
Source: Royal Society of Chemistry journal article supplement (doi:10.1039/c2ta00068g), 2012-11-15
Supplement: c2ta00068g.pdf [file c2ta00068g.pdf]

## Supplementary Information

### High strength films with gas-barrier fabricated from chitin solution dissolved at low temperature

Bo Duan<sup>a</sup>, Chunyu Chang<sup>a</sup>, Beibei Ding<sup>a</sup>, Lina Zhang<sup>a\*</sup>, Jie Cai<sup>a\*</sup>, Min Xu<sup>b</sup>,  
Shichao Feng<sup>c</sup>, Jizhong Ren<sup>c</sup>, Xiaowen Shi<sup>d</sup>, Yumin Du<sup>d</sup>

<sup>a</sup> Department of Chemistry, Wuhan University, Wuhan 430072, China

<sup>b</sup> Department of Physics, East China Normal University, Shanghai 200062, China

<sup>c</sup> Dalian Institute of Chemical Physics, Chinese Academy of Sciences, Dalian 116023,  
China

<sup>d</sup> College of Resource and Environmental Sciences, Wuhan University, Wuhan  
430072, China

\*Corresponding author email address: [lnzhang@public.wh.hb.cn](mailto:lnzhang@public.wh.hb.cn) (Lina Zhang)  
[jiecaiwhu@hotmail.com](mailto:jiecaiwhu@hotmail.com) (Jie Cai)

**Table S1** Solid-State CP/MAS  $^{13}\text{C}$  NMR Spectral Data of the purified chitin, RChE,  $\alpha$ -Chitin and  $\beta$ -Chitin.

| Samples          | Chemical Shift/ppm |       |      |      |      |      |      |                       | Refs      |
|------------------|--------------------|-------|------|------|------|------|------|-----------------------|-----------|
|                  | C7 (C=O)           | C1    | C4   | C5   | C3   | C6   | C2   | C8 (CH <sub>3</sub> ) |           |
| Purified chitin  | 172.2              | 103.2 | 82.1 | 74.9 | 72.4 | 59.7 | 54.1 | 22.2                  | This work |
| RChE             | 173.4              | 103.1 | 82.3 | 74.6 | 72.6 | 60.3 | 54.5 | 22.1                  | This work |
| $\alpha$ -chitin | 173.0              | 104.0 | 82.9 | 75.6 | 73.4 | 60.6 | 54.8 | 22.6                  | [ref]     |
| $\beta$ -chitin  | 173.6              | 104.1 | 83.4 | 74.2 | 73.6 | 60.8 | 55.2 | 22.8                  | [ref]     |

ref: H. Kono, *Biopolymers*, 2004, **75**, 255-263

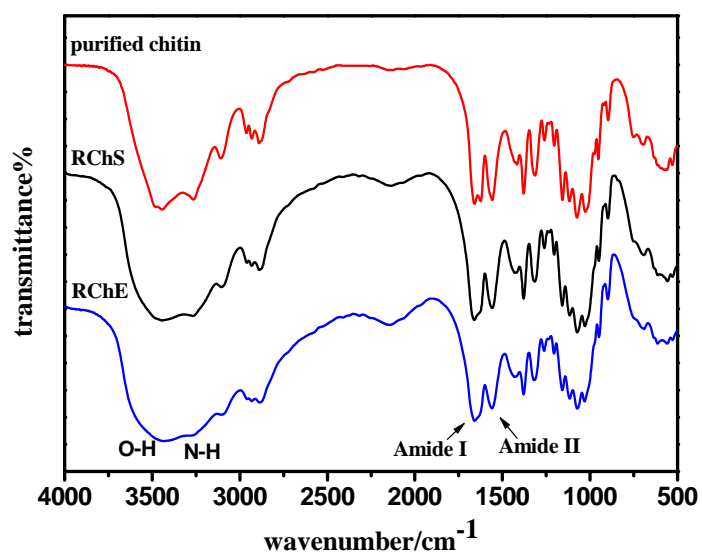

**Fig. S1** FT-IR spectra of the purified chitin, RChS and RChE, respectively.

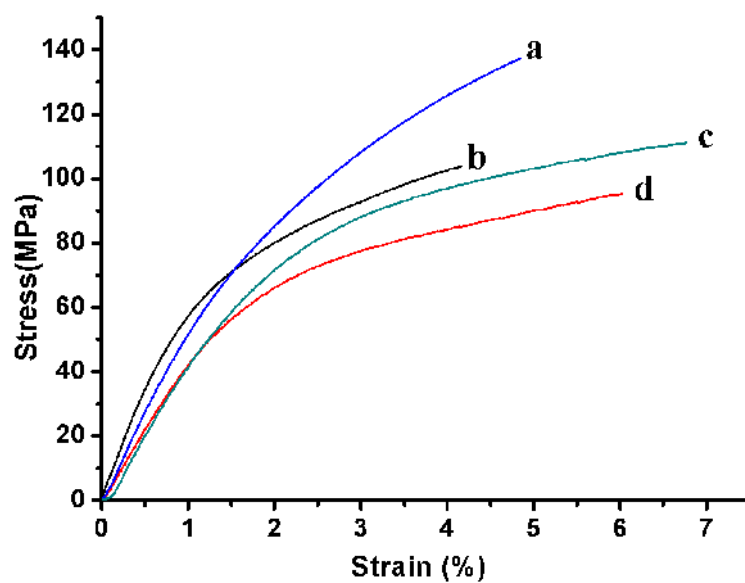

**Fig. S2** Stress-strain ( $\sigma$ - $\varepsilon$ ) curves of the RChD (a, c) and RChE (b, d) dried at 60 °C in vacuum (a, b) and 75% relative humidity (c, d), respectively.

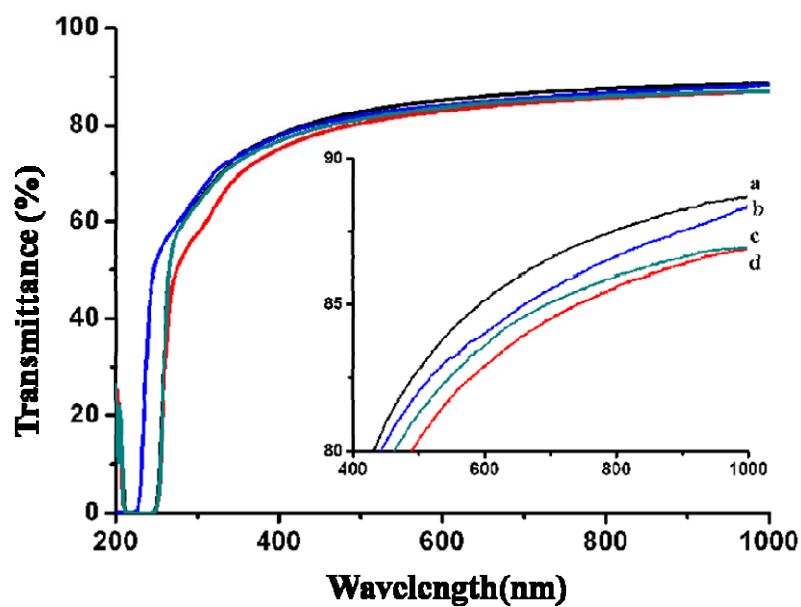

**Fig. S3** Light transmittance ( $T_r$ ) of the RChE (a, b) and RChD (c, d) dried at 60 °C in vacuum (b, c) and 75% relative humidity (a, d), respectively.

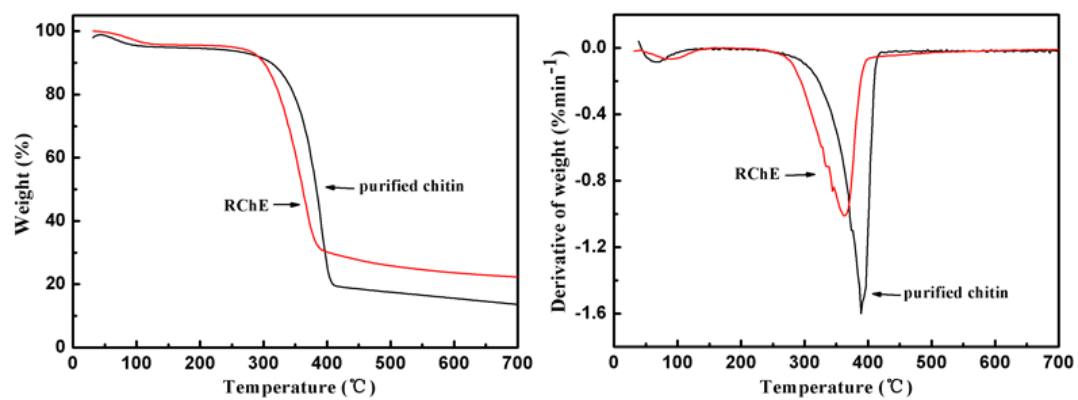

**Fig. S4** TG (a) and DTG (b) curves of the purified chitin and RChE film.

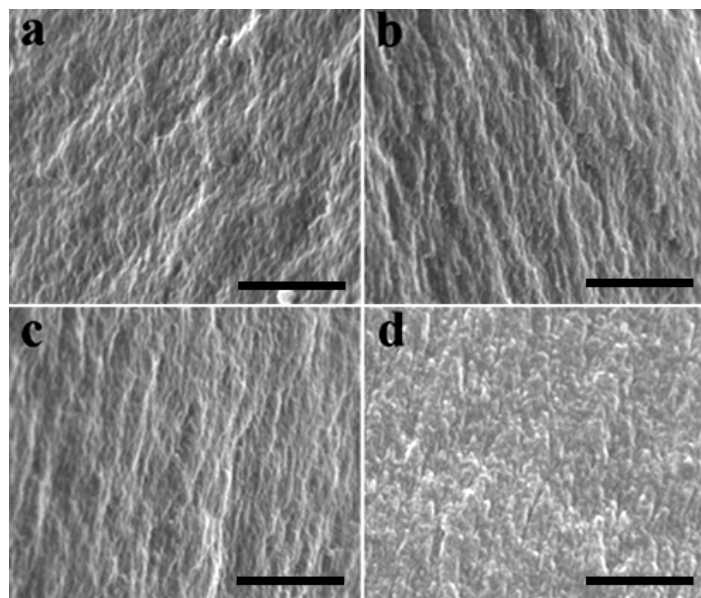

**Fig.S5** SEM images of the cross-sections of the RChE (a), RChG2 (b), RChG4 (c) and RChG6 (d) films dried at ambient temperature (scale bar = 2  $\mu\text{m}$ ).
